# Supplementary material for: Facile fabrication of polyurethane-based graphene foam/lead zirconate titanate/polydimethylsiloxane composites with good damping performance
Source: Royal Society of Chemistry journal article supplement (doi:10.1039/c8ra00266e), 2018-01-01
Supplement: c8ra00266e1.pdf [file c8ra00266e1.pdf]

## Supporting Information

### Facile fabrication of polyurethane-based graphene foam/lead zirconate titanate/polydimethylsiloxane composites with good damping performance

Chunmei Zhang<sup>a,1</sup>, Yujie Chen<sup>a,1</sup>, Hua Li<sup>a,b,\*</sup>, Wenchao Xue<sup>a</sup>, Ran Tian<sup>a</sup>, Roberto Dugnani<sup>c</sup>, Hezhou

Liu<sup>a,b</sup>

<sup>a</sup>State Key Laboratory of Metal Matrix Composites, School of Materials Science and Engineering, Shanghai Jiao Tong University, Dongchuan Road No. 800, Shanghai 200240, China.

<sup>b</sup>Collaborative Innovation Center for Advanced Ship and deep-Sea Exploration, Shanghai Jiao Tong University.

<sup>c</sup>Michigan-Shanghai Jiao Tong University Joint Institute, China.

\*Corresponding author: Hua Li (email: lih@sjtu.edu.cn)

<sup>1</sup>These authors contributed equally to this work.

**Figure S1** The SEM images (a) and (b) and the XRD spectra (c) of the PZT ceramics used
